# Supplementary material for: Self-assembly of Fmoc-amino acids in capillary confined space forming a parallel ordered fiber network for application in vascularization
Source: Royal Society of Chemistry journal article supplement (doi:10.1039/d2bm00041e), 2022-01-01
Supplement: d2bm00041e1.pdf [file d2bm00041e1.pdf]

Electronic Supplementary Material (ESI) for Biomaterials Science.  
This journal is © The Royal Society of Chemistry 2022

## Electronic Supplementary Information

### Self-assembly of Fmoc-amino acids in capillary confined space forming parallel ordered fiber network for application of vascularization

Qianqian Dong,<sup>‡abc</sup> Meiyue Wang,<sup>‡c</sup> Anhe Wang,<sup>c</sup> Chunjing Yu,<sup>ab</sup> Shuo Bai,<sup>\*c</sup> Jian Yin<sup>\*b</sup> and  
Qingjun You<sup>\*ab</sup>

<sup>a</sup> Department of Oncology, Affiliated Hospital of Jiangnan University, Wuxi 214062, P.R. China. E-mail: youqingjun@jiangnan.edu.cn

<sup>b</sup> Key Laboratory of Carbohydrate Chemistry and Biotechnology, Ministry of Education, School of Biotechnology, Jiangnan University, Wuxi, 214122, P.R. China. E-mail: youqingjun@jiangnan.edu.cn, jianyin@jiangnan.edu.cn

<sup>c</sup> State Key Laboratory of Biochemical Engineering, Institute of Process Engineering, Chinese Academy of Sciences, Beijing 100190, P.R. China. E-mail: baishuo@ipe.ac.cn

<sup>‡</sup> These authors contributed equally to this work.

\* Corresponding author

Prof. Qingjun You, Email: youqingjun@jiangnan.edu.cn

Prof. Jian Yin, Email: jianyin@jiangnan.edu.cn

Prof. Shuo Bai, Email: baishuo@ipe.ac.cn

| <b>Fmoc-amino acid</b> | <b>LogP</b> |
|------------------------|-------------|
| Fmoc-L                 | 4.1         |
| Fmoc-Y                 | 4.15        |
| Fmoc-T                 | 2.33        |
| Fmoc-S                 | 2.01        |

**Fig. S1** The LogP of the Fmoc amino acid.

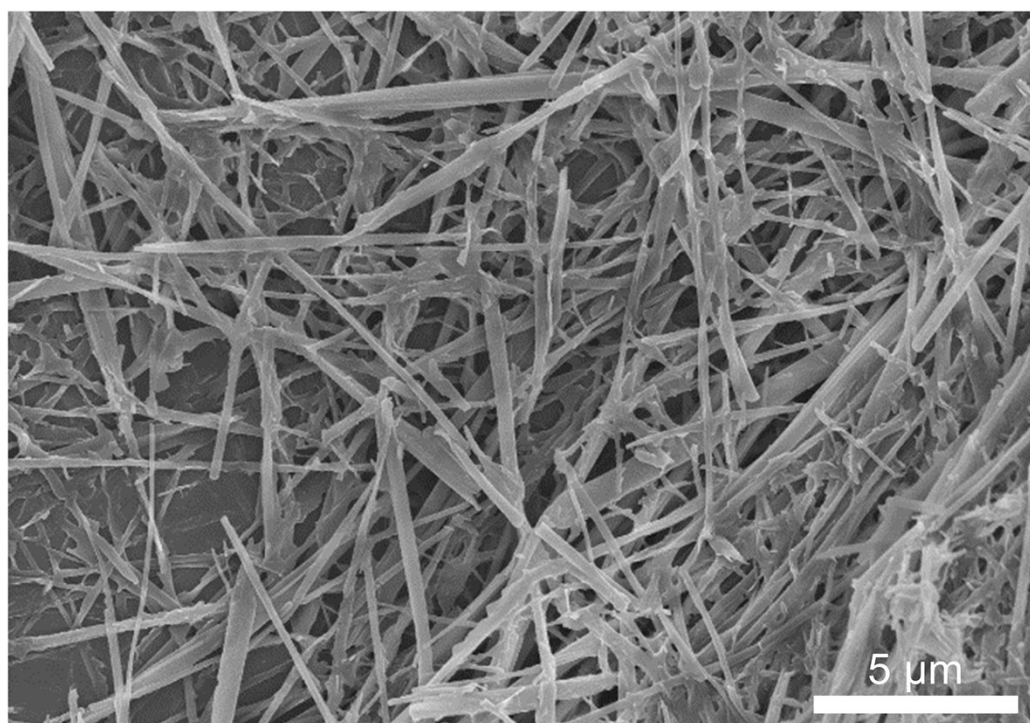

**Fig. S2** SEM of Fmoc-L/L-NH<sub>2</sub> in bulk solution.

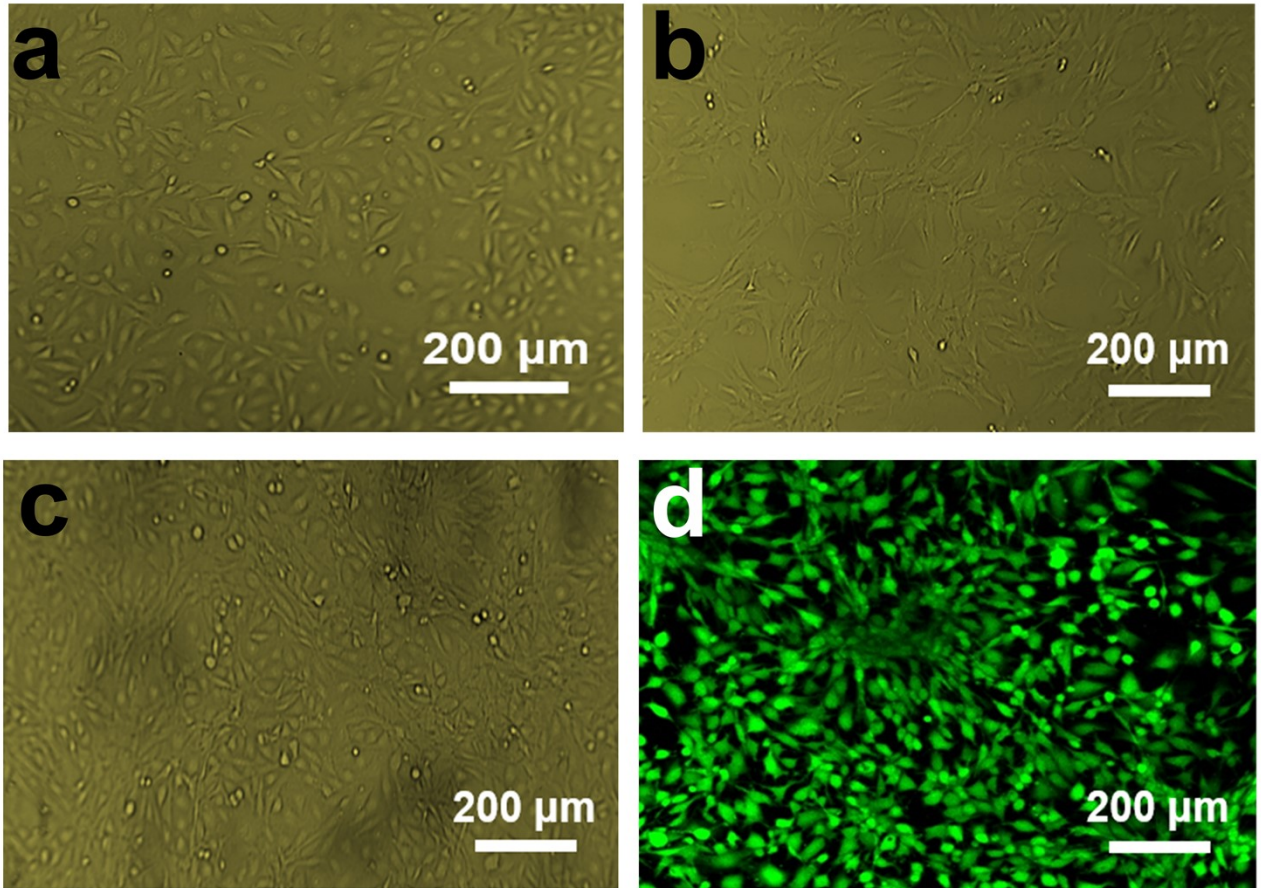

**Fig. S3** Optical images of (a) HUVEC, (b) MEF and (c) HUVEC/MEF cells, (d) CLSM images of the HUVEC/MEF cells.
